# Supplementary material for: The borderless world of chemical bonding across the van der Waals crust and the valence region
Source: Royal Society of Chemistry journal article supplement (doi:10.1039/d3sc02238b), 2023-01-01
Supplement: d3sc02238b1.xlsx [file d3sc02238b1.xlsx]

## Sheet: Table S1 - Crust widths
Element	At. Number	R cov.	R VdW	Crust width	VdW Crust Vol	Valence Sphere
H	1	0.307	1.2	0.893	98.3256	1.67445
He	2	0.28	1.43	1.15	99.2493	0.750699
Li	3	1.282	2.22	0.938	80.7423	19.2577
Be	4	0.956	1.98	1.024	88.7442	11.2558
B	5	0.844	1.91	1.066	91.3717	8.62834
C	6	0.762	1.77	1.008	92.0211	7.97894
N	7	0.706	1.66	0.954	92.3071	7.6929
O	8	0.661	1.5	0.839	91.4428	8.55718
F	9	0.572	1.46	0.888	93.9865	6.01353
Ne	10	0.58	1.58	1	95.0533	4.94667
Na	11	1.662	2.5	0.838	70.6186	29.3814
Mg	12	1.412	2.51	1.098	82.1974	17.8026
Al	13	1.213	2.25	1.037	84.3312	15.6688
Si	14	1.108	2.19	1.082	87.0495	12.9505
P	15	1.072	1.9	0.828	82.0393	17.9607
S	16	1.046	1.89	0.844	83.0484	16.9516
Cl	17	1.021	1.82	0.799	82.3452	17.6548
Ar	18	1.065	1.83	0.765	80.2896	19.7104
K	19	2.032	2.73	0.698	58.7634	41.2366
Ca	20	1.758	2.67	0.912	71.4555	28.5445
Sc	21	1.701	2.58	0.879	71.3415	28.6585
Ti	22	1.604	2.46	0.856	72.2791	27.7209
V	23	1.527	2.42	0.893	74.877	25.123
Cr	24	1.389	2.45	1.061	81.7775	18.2225
Mn	25	1.387	2.45	1.063	81.8561	18.1439
Fe	26	1.323	2.44	1.117	84.0592	15.9408
Co	27	1.26	2.4	1.14	85.5297	14.4703
Ni	28	1.241	2.4	1.159	86.1745	13.8255
Cu	29	1.316	2.38	1.064	83.0942	16.9058
Zn	30	1.223	2.39	1.167	86.6006	13.3994
Ga	31	1.221	2.32	1.099	85.4225	14.5775
Ge	32	1.202	2.29	1.088	85.5387	14.4613
As	33	1.187	1.88	0.693	74.8303	25.1697
Se	34	1.2	1.82	0.62	71.3365	28.6635
Br	35	1.2	1.86	0.66	73.1463	26.8537
Kr	36	1.16	2.25	1.09	86.2967	13.7033
Rb	37	2.195	3.21	1.015	68.0266	31.9734
Sr	38	1.952	2.84	0.888	67.5298	32.4702
Y	39	1.896	2.75	0.854	67.2269	32.7731
Zr	40	1.747	2.52	0.773	66.6821	33.3179
Nb	41	1.643	2.56	0.917	73.5642	26.4358
Mo	42	1.539	2.45	0.911	75.2134	24.7866
Tc	43	1.472	2.44	0.968	78.044	21.956
Ru	44	1.457	2.46	1.003	79.2235	20.7765
Rh	45	1.417	2.44	1.023	80.4143	19.5857
Pd	46	1.386	2.15	0.764	73.2099	26.7901
Ag	47	1.452	2.53	1.078	81.0967	18.9033
Cd	48	1.445	2.49	1.045	80.4564	19.5436
In	49	1.416	2.46	1.044	80.9285	19.0715
Sn	50	1.389	2.42	1.031	81.0913	18.9087
Sb	51	1.394	2.47	1.076	82.0238	17.9762
Te	52	1.381	1.99	0.609	66.5788	33.4212
I	53	1.394	2.04	0.646	68.0921	31.9079
Xe	54	1.401	2.06	0.659	68.5433	31.4567
Cs	55	2.44	3.49	1.05	65.8262	34.1738
Ba	56	2.153	3.03	0.877	64.124	35.876
La	57	2.073	2.98	0.907	66.3373	33.6627
Ce	58	2.043	2.88	0.837	64.3033	35.6967
Pr	59	2.033	2.92	0.887	66.2508	33.7492
Nd	60	2.012	2.95	0.938	68.2738	31.7262
Pm	61	1.99
Sm	62	1.981	2.9	0.919	68.1243	31.8757
Eu	63	1.977	2.87	0.893	67.3131	32.6869
Gd	64	1.955	2.83	0.875	67.0329	32.9671
Tb	65	1.944	2.79	0.846	66.172	33.828
Dy	66	1.919	2.87	0.951	70.1063	29.8937
Ho	67	1.919	2.81	0.891	68.1503	31.8497
Er	68	1.887	2.83	0.943	70.3547	29.6453
Tm	69	1.898	2.79	0.892	68.517	31.483
Yb	70	1.869	2.8	0.931	70.2591	29.7409
Lu	71	1.87	2.74	0.87	68.2113	31.7887
Hf	72	1.746	2.63	0.884	70.7406	29.2594
Ta	73	1.695	2.53	0.835	69.929	30.071
W	74	1.616	2.57	0.954	75.1387	24.8613
Re	75	1.511	2.49	0.979	77.6542	22.3458
Os	76	1.443	2.48	1.037	80.301	19.699
Ir	77	1.407	2.41	1.003	80.101	19.899
Pt	78	1.356	2.29	0.934	79.2378	20.7622
Au	79	1.357	2.32	0.963	79.9887	20.0113
Hg	80	1.322	2.45	1.128	84.2893	15.7107
Tl	81	1.448	2.47	1.022	79.8528	20.1472
Pb	82	1.46	2.6	1.14	82.2933	17.7067
Bi	83	1.48	2.54	1.06	80.2174	19.7826
Po	84	1.403
At	85	1.5
Rn	86	1.5
Fr	87	2.6
Ra	88	2.214
Ac	89	2.148	2.8	0.652	54.853	45.147
Th	90	2.064	2.93	0.866	65.0436	34.9564
Pa	91	1.997	2.88	0.883	66.6607	33.3393
U	92	1.964	2.71	0.746	61.9358	38.0642
Np	93	1.903	2.82	0.917	69.2695	30.7305
Pu	94	1.866	2.81	0.944	70.717	29.283
Am	95	1.803	2.83	1.027	74.14	25.86
Cm	96	1.81

## Sheet: Table S2 - He2
He-He (Å)	E(Electr)	E(Pauli)	E(Disp)	E(Pol)	E(CT)	E(int)	He-He pen(%)		Energies in kJ/mol
1.6	-8.9489	46.977	-4.418	-0.1424	-2.9104	30.5574	54.7826
1.9	-2.176	12.2655	-1.8781	-0.0083	-0.5231	7.6801	41.7391
2.2	-0.4653	3.068	-0.9843	-0.0025	-0.1868	1.4292	28.6957
2.5	-0.089	0.7304	-0.7778	-0.0008	-0.165	-0.3022	15.6522
2.8	-0.0155	0.1654	-0.6224	0	-0.1846	-0.6571	2.6087
3.1	-0.0025	0.037	-0.3843	0	-0.1776	-0.5277	-10.4348
3.4	-0.0004	0.0085	-0.1772	0	-0.1219	-0.2913	-23.4783
3.7	0	0.0026	-0.0654	0	-0.0597	-0.1226	-36.5217
4	0	0.001	-0.0186	0	-0.0221	-0.0398	-49.5652
4.3	0	0	-0.0045	0	-0.0065	-0.0116	-62.6087
4.8	0	0	0	0	0	0	-84.3478
2.85085	-0.0114	0.1284	-0.5932	0	-0.1863	-0.66	0.4		Minimum

## Sheet: Table S3 - Ne2
Ne-Ne (Å)	E(Electr)	E(Pauli)	E(Disp)	E(Pol)	E(CT)	E(int)	Ne-Ne pen(%)		Energies in kJ/mol
1.9	-30.704	98.1232	-11.3346	-1.2669	-2.6666	52.151	63
2.2	-7.3006	24.4751	-5.4056	-0.2112	-0.5317	11.0261	48
2.5	-1.6619	6.0738	-2.5288	-0.0423	-0.1637	1.6771	33
2.8	-0.3865	1.53	-1.4672	-0.007	-0.0958	-0.4265	18
3.1	-0.0992	0.3964	-1.0388	-0.0015	-0.0575	-0.8006	3
3.4	-0.0295	0.1101	-0.6776	-0.0015	-0.0567	-0.6553	-12
3.7	-0.0099	0.0323	-0.3583	-0.0024	-0.0529	-0.3912	-27
4	-0.0035	0.015	-0.1662	-0.0017	-0.035	-0.1915	-42
4.3	-0.0012	0.0096	-0.0745	-0.0008	-0.0186	-0.0856	-57
4.8	-0.0002	0.0032	-0.0186	0	-0.0055	-0.0213	-82
3.12066	-0.0908	0.3605	-1.0096	-0.0013	-0.0565	-0.8	1.5		Minimum

## Sheet: Table S4 - Ar2
Ne-Ne (Å)	E(Electr)	E(Pauli)	E(Disp)	E(Pol)	E(CT)	E(int)	Ar-Ar pen(%)		Energies in kJ/mol
2.8	-20.6496	57.6166	-11.8088	-0.7026	-3.4639	20.9917	61.3636
3.1	-6.4796	19.04	-6.64	-0.2596	-1.1138	4.547	44.3182
3.4	-1.9881	6.2689	-3.5234	-0.0977	-0.4447	0.215	27.2727
3.7	-0.6128	2.0818	-1.9564	-0.0232	-0.2298	-0.7405	10.2273
4	-0.1965	0.691	-1.2509	-0.0042	-0.1362	-0.8968	-6.81818
4.3	-0.0679	0.2299	-0.9119	-0.0016	-0.0863	-0.8378	-23.8636
4.6	-0.0258	0.0826	-0.6261	-0.0026	-0.067	-0.639	-40.9091
4.9	-0.0107	0.0395	-0.3753	-0.003	-0.0563	-0.4058	-57.9545
5.4	-0.0027	0.0077	-0.1307	-0.0018	-0.0336	-0.1611	-86.3636
3.915	-0.2695	0.9451	-1.4058	-0.0059	-0.1573	-0.89	-1.2		Minimum

## Sheet: Table S5 - Kr2
Kr-Kr (Å)	E(Electr)	E(Pauli)	E(Disp)	E(Pol)	E(CT)	E(int)	Kr-Kr pen(%)		Energies in kJ/mol
3.1	-23.4892	60.013	-12.3837	-0.7556	-4.2806	19.104	57.1429
3.4	-8.1817	21.632	-7.2736	-0.3321	-1.6225	4.2222	40.6593
3.7	-2.7789	7.669	-3.9349	-0.1543	-0.7016	0.0993	24.1758
4	-0.929	2.7163	-2.1907	-0.0465	-0.3715	-0.8214	7.69231
4.3	-0.3103	0.9632	-1.3845	-0.0098	-0.2446	-0.986	-8.79121
4.6	-0.1054	0.333	-0.9818	-0.0028	-0.1781	-0.9349	-25.2747
4.9	-0.0374	0.1092	-0.7529	-0.0019	-0.1307	-0.8138	-41.7582
5.2	-0.0142	0.0413	-0.5173	-0.003	-0.0981	-0.5913	-58.2418
5.7	-0.0033	0.0075	-0.2281	-0.003	-0.0646	-0.2915	-85.7143
4.3652	-0.2449	0.771	-1.2859	-0.0066	-0.2275	-0.99	-7.6		Minimum

## Sheet: Table S6 - Xe2
Xe-Xe (Å)	E(Electr)	E(Pauli)	E(Disp)	E(Pol)	E(CT)	E(int)	Xe-Xe pen(%)		Energies in kJ/mol
3.4	-31.8622	83.1878	-21.1645	-1.2698	-6.5548	22.3365	65.9091
3.7	-12.2944	33.3367	-12.4212	-0.4645	-2.6722	5.4844	48.8636
4	-4.6517	13.1416	-6.843	-0.2556	-1.0798	0.3115	31.8182
4.3	-1.7276	5.103	-3.6684	-0.1146	-0.4268	-0.8343	14.7727
4.6	-0.6325	1.9584	-2.0421	-0.0343	-0.1784	-0.929	-2.27273
4.9	-0.2302	0.7463	-1.2666	-0.0066	-0.0946	-0.8517	-19.3182
5.2	-0.0842	0.2838	-0.9539	-0.0024	-0.0624	-0.8192	-36.3636
5.5	-0.0313	0.1083	-0.7094	-0.0022	-0.0446	-0.6792	-53.4091
5.8	-0.0122	0.0416	-0.5203	-0.0026	-0.0332	-0.5266	-70.4545
6.3	-0.0029	0.0087	-0.2596	-0.0032	-0.0232	-0.2802	-98.8636
4.66605	-0.5064	1.5843	-1.8371	-0.0231	-0.1508	-0.93	-3.4		Minimum

## Sheet: Table S7 Ng (s)
		N =	80				Data from MOGADOC and the ICSD
He2						Ne2							Ar2								Ng-Ng'
	ID	P(MPa)	He···He (Å)	Pen (%)			ID	P (GPa)	Ne···Ne (Å)	Pen (%)	Ref.			ID	P (GPa)	Ar···Ar (Å)	Pen (%)	Ref.			AB	ID	P (GPa)	A···B (Å)	Pen (%)	Ref.
He2 (calcd.)			2.96	-4.3		Ne2 (g)	918434		3.094	3.3	Wuest		Ar2(g)			3.761	6.8		LC 58567, 80199		Ne-Ar	LC: 74893		3.607	-4.6
He(s)	43425	2.9	3.559	-30.4			918434		3.337	-8.9	Wuest					3.767	6.4							3.464	3
	43426	2.97	3.644	-34.1			24602	-	3.196	-1.8			Ar(s)	24788 -ND		3.717	9.3							3.595	-4
	44396	6.6	3.501	-27.9		Ne (s)	24787	-	3.192	-1.6				29279		3.758	6.9				Ne-Kr	LC: 80585		3.645	0.3
	44395	10	3.473	-26.7			43427	-	3.155	0.3				53814		3.84	2.3				Ne-Xe	LC: 70471		3.994	-7.9
	44394	18.3	3.439	-25.2			65884	10	2.522	31.9	8			77918	6.5	3.798	4.7							3.877	-0.9
	22384	1715.52	3	-6.1			65885	20	2.404	37.8	8		Kr2, Xe2											3.9375	-4.1
							65886	27	2.344	40.8	8			ID	P (GPa)	Kr···Kr (Å)	Pen (%)	Ref.			Ar-Kr	LC: 80585		3.894	6.5
							65887	31	2.304	42.8	8		Kr2(g)	LC52435		4.017	6.8				Ar-Xe	LC: 80585	4.14	4.5
							65888	36	2.284	43.8	8		Kr(s)	9785		3.999	7.8							4.094	7.2
							65889	40	2.256	45.2	8			43726		3.987	8.4							4.117	7.9
							65890	52	2.22	47	8		Xe(s)	9786		4.34	12.5							4.096	7
							65891	57	2.2	48	8			43428		4.336	12.7						LC-70471, 106224, 82761:
							259303	60	2.188	48.6	9										Kr-Xe			4.234	6.5
							65892	64	2.176	49.2	8													4.218	7.4
							259302	71	2.155	50.3	9													4.203	8.2
							65893	74	2.146	50.7	8
							65894	78	2.136	51.2	8										Noble Gas-small closed shell molecules (gas phase)
							65895	82	2.131	51.5	8										Ar···CH4			3.999	-15.3
							65896	84	2.123	51.8	8										Kr···CH4			4.094	-13.2
							259301	84	2.123	51.8	9										Xe·· CH4			4.264	-11.4
							65897	88	2.116	52.2	8										Ar H (k3)			3.788	-36.6
							65898	91	2.111	52.4	8										Kr H (k3)			3.87	-50.9
							65899	94	2.102	52.9	8										Xe H (k1)			3.438	2.4
							65900	98	2.095	53.2	8										Ar···Cl-F			3.286	28.2
							65901	101	2.09	53.5	8										Ar···Br-Cl			3.466	21.7
							65902	104	2.083	53.8	8										Ar···I-Cl			3.5757	25.4
							65903	108	2.076	54.2	8										Kr···Cl-F			3.3845	29.6
							259300	109	2.079	54	9										Kr···I-H			4.041	4.4
							65904	110	2.07	54.5	8										Ar···SiF4			3.804	17.5
							259299	129	2.053	55.4	9										Kr··· SiF4			3.942	0.16
							259298	159	2.005	57.8	9
							259297	170	2.002	57.9

## Sheet: Table S8 pCP pressure
	N =	36			Data from the ICSD
N =	14			N =	12		N =	4			N =	6
Pressure	CC pen (%)	NO pen (%)		Pressure	H···He pen	Pressure	He···C pen	He1···N1 pen	He-He pen		Noble Gas	Cage	Cage···Ng pen	Eint
9.51	30.6436	28.6592		3.83	26.5686	3.83	23.5185	15.8095	8.26087		He	Cubane	84.4105	322.4
10.39	31.4851	29.0503		4.18	26.8627	4.18	24.9537	15.4286	8.6087		He	Dodecahedrane	94.4436	35.5
11.59	32.6238	30		4.67	27.451	4.67	25.9722	16.1429	10.087		He	Buckyball	96.792	1.2
13.16	34.2079	31.0056		5.15	29.5098	5.15	27.4537	17.5714	10.8696		Ne	Buckyball	98.8529	-0.8
14.37	34.901	31.5642		5.73	32.7451	5.73	28.5185	19.2381	11.7391		Ar	Buckyball	97.8819	5.8
15.6	35.7426	32.6816		6.01	33.5784	6.01	28.8426	20.5238	12.5217		Kr	Buckyball	98.6133	11.5
17.06	36.6337	33.352		6.68	34.4608	6.68	29.8148	19.9524	13.6522
18.15	37.2277	33.9106		7.35	35.4412	7.35	30	21.9524	14.4348				%	kcal/mol
19.73	37.9208	34.6369		8.14	36.3235	8.14	29.7685	22.0476	15.5652
20.97	38.6139	35.1955		8.82	37.0098	8.82	30.5093	23.4286	16.5217		Figure 10
22.43	39.1584	35.6983		9.51	37.0098	9.51	29.537	29.2381	23.6087
24	39.703	36.4246		26.19	37.0098	10.39	29.6759	30.9048	25
25.05	40.099	36.7598				11.59	31.7593	31.2857	28
26.19	40.9901	37.3184		GPa	%	13.16	33.1481	32.6667	29.913
						14.37	33.8889	33.619	31.0435
GPa	%	%				15.6	35.5556	33.4286	32.3043
						17.06	35.463	35.619	33.087
Figure 08a				Figure 08b		18.15	36.6204	35.6667	34.2609
						19.73	37.9167	35.8095	35.3913
						20.97	38.7037	36.1905	35.9565
						22.43	39.4907	36.9048	37.0435
						24	40.1852	37.2857	38.1304
						25.05	40.8333	37.5714	38.9565
						26.19	41.1111	37.381	39.4348
						GPa	%	%	%

## Sheet: Table S9
		N =	60
N =	20			N =	20			N =	20
He···C dist	He···C pen	Eint		Ne···C dist	Ne···C pen	Eint		Ar···C dist	Ar···C pen	Eint
2.088	51.4815	64.097		2.118	61.2935	207.089		2.2065	79.9734	531.555
2.3035	41.5046	34.059		2.308	51.8408	110.224		2.3325	73.2713	337.216
2.5945	28.0324	25.562		2.5745	38.5821	82.831		2.564	60.9574	260.715
2.4395	35.2083	16.526		2.448	44.8756	55.99		2.475	65.6915	199.151
2.6365	26.088	15.076		2.6295	35.8458	47.746		2.6235	57.7926	165.82
2.822	17.5	10.217		2.8085	26.9403	34.468		2.782	49.3617	129.3
2.9445	11.8287	8.719		2.934	20.6965	29.111		2.91	42.5532	109.144
2.97	10.6481	5.481		2.9645	19.1791	20.343		2.9515	40.3457	84.249
3.043	7.26852	3.597		3.037	15.5721	13.561		3.0215	36.6223	60.791
3.0425	7.29167	1.78		3.039	15.4726	8.006		3.03	36.1702	42.486
3.077	5.69444	0.976		3.0735	13.7562	6.354		3.0645	34.3351	35.713
3.2035	-0.162037	0.384		3.2	7.46269	3.776		3.19	27.6596	25.977
3.38	-8.33333	-0.305		3.377	-1.34328	1.955		3.3685	18.1649	19.462
3.47	-12.5	-0.619		3.468	-5.87065	1.018		3.46	13.2979	15.364
3.4345	-10.8565	-1.225		3.4315	-4.05473	-0.522		3.424	15.2128	9.17
3.418	-10.0926	-1.732		3.418	-3.38308	-2.576		3.4165	15.6117	0.926
3.8725	-31.1343	-1.762		3.8715	-25.9453	-2.235		3.866	-8.29787	2.444
3.7545	-25.6713	-1.819		3.752	-20	-2.54		3.7495	-2.10106	0.67
3.581	-17.6389	-2.229		3.5815	-11.5174	-3.768		3.5805	6.8883	-4.631
3.552	-16.2963	-2.434		3.5525	-10.0746	-4.266		3.553	8.35106	-7.061
Å	%	kcal/mol		Å	%	kcal/mol		Å	%	kcal/mol
Figures 11a, b

## Sheet: Table S10
F-Xe dist.	F-Xe pen	Eint		Br-Xe dist.	Br-Xe pen	Eint
3.178	31.7514	-1.053		3.566	37.2727	-0.656
3.321	23.6723	-1.259		3.708	28.0519	-0.951
3.517	12.5989	-1.285		4.014	8.18182	-1.039
3.721	1.07345	-1.178		4.332	-12.4675	-0.864
5.5	-99.435	-0.315		5.5	-88.3117	-0.436
Å	%	kcal/mol		Å	%	kcal/mol
Figure 12

[truncated: 30 more sheets: Table S11, Table S12, Table S13, Table S14, Table S15, Table S16, Table S17, Table S18, Table S19, Table S20, Table S21, Table S22, Table S23, Table S24, Table S.25, Table S26, Table S27, Table S28, Table S29, Table S30 …]
